# Supplementary material
Source: PubMed Central journal article supplement (PMC4874934)
Supplement: HESR-51-1212-s003.pdf [file HESR-51-1212-s003.pdf]

# Compare Nursing Homes

| General Information                                                                                                                        | Inspections and Complaints                                                                                  | Staffing | Quality Measures | Penalties |
|--------------------------------------------------------------------------------------------------------------------------------------------|-------------------------------------------------------------------------------------------------------------|----------|------------------|-----------|
| <b>NURSING HOME<br/>A</b>                                                                                                                  |                                                                                                             |          |                  |           |
| <b>Overall Rating</b>                                                                                                                      | <br>Average              |          |                  |           |
| <b>Health Inspection Rating</b>                                                                                                            | <br>Average              |          |                  |           |
| <b>Staffing Rating</b>                                                                                                                     | <br>Much Below Average   |          |                  |           |
| <b>Quality Measure Rating</b>                                                                                                              | <br>Much Above Average |          |                  |           |
| <b>LONG-STAY RESIDENTS</b>                                                                                                                 |                                                                                                             |          |                  |           |
| <b>Current data collection period</b>                                                                                                      |                                                                                                             |          |                  |           |
| Percent of long-stay residents experiencing one or more falls with major injury.<br><i>Lower percentages are better.</i>                   | 1.7%                                                                                                        |          |                  |           |
| Percent of long-stay residents with a urinary tract infection.<br><i>Lower percentages are better.</i>                                     | 0.9%                                                                                                        |          |                  |           |
| Percent of long-stay residents who self-report moderate to severe pain.<br><i>Lower percentages are better.</i>                            | 3.0%                                                                                                        |          |                  |           |
| Percent of long-stay high-risk residents with pressure ulcers.<br><i>Lower percentages are better.</i>                                     | 18.2%                                                                                                       |          |                  |           |
| Percent of long-stay low-risk residents who lose control of their bowels or bladder.<br><i>Lower percentages are better.</i>               | 11.6%                                                                                                       |          |                  |           |
| Percent of long-stay residents who have/had a catheter inserted and left in their bladder.<br><i>Lower percentages are better.</i>         | 5.3%                                                                                                        |          |                  |           |
| Percent of long-stay residents who were physically restrained.<br><i>Lower percentages are better.</i>                                     | 0.0%                                                                                                        |          |                  |           |
| Percent of long-stay residents whose need for help with daily activities has increased.<br><i>Lower percentages are better.</i>            | 7.1%                                                                                                        |          |                  |           |
| Percent of long-stay residents who lose too much weight.<br><i>Lower percentages are better.</i>                                           | 20.1%                                                                                                       |          |                  |           |
| Percent of long-stay residents who have depressive symptoms.<br><i>Lower percentages are better.</i>                                       | 3.9%                                                                                                        |          |                  |           |
| Percent of long-stay residents assessed and given, appropriately, the seasonal influenza vaccine.<br><i>Higher percentages are better.</i> | 87.0%                                                                                                       |          |                  |           |
| Percent of long-stay residents assessed and given, appropriately, the pneumococcal vaccine.<br><i>Higher percentages are better.</i>       | 84.6%                                                                                                       |          |                  |           |
| Percent of long-stay residents who received an antipsychotic medication.<br><i>Lower percentages are better.</i>                           | 20.8%                                                                                                       |          |                  |           |
