# Supplementary material
Source: PubMed Central journal article supplement (PMC4874934)
Supplement: HESR-51-1212-s004.pdf [file HESR-51-1212-s004.pdf]

# Compare Nursing Homes

| General Information                                                                                                                        | Inspections and Complaints                                                                                 | Staffing | Quality Measures                                                                                       | Penalties |
|--------------------------------------------------------------------------------------------------------------------------------------------|------------------------------------------------------------------------------------------------------------|----------|--------------------------------------------------------------------------------------------------------|-----------|
|                                                                                                                                            | Nursing Home D                                                                                             |          | Nursing Home E                                                                                         |           |
| <b>Overall Rating</b>                                                                                                                      | <br>Average              |          | <br>Average         |           |
| <b>Health Inspection Rating</b>                                                                                                            | <br>Average              |          | <br>Below Average   |           |
| <b>Staffing Rating</b>                                                                                                                     | <br>Much Below Average |          | <br>Above Average |           |
| <b>Quality Measure Rating</b>                                                                                                              | <br>Much Above Average |          | <br>Below Average |           |
| <b>LONG-STAY RESIDENTS</b><br><b>Current data collection period</b>                                                                        |                                                                                                            |          |                                                                                                        |           |
| Percent of long-stay residents experiencing one or more falls with major injury.<br><b>Lower percentages are better.</b>                   | 0.0%                                                                                                       |          | 6.0%                                                                                                   |           |
| Percent of long-stay residents with a urinary tract infection.<br><b>Lower percentages are better.</b>                                     | 3.4%                                                                                                       |          | 12.2%                                                                                                  |           |
| Percent of long-stay residents who self-report moderate to severe pain.<br><b>Lower percentages are better.</b>                            | 2.4%                                                                                                       |          | 4.6%                                                                                                   |           |
| Percent of long-stay high-risk residents with pressure ulcers.<br><b>Lower percentages are better.</b>                                     | 4.9%                                                                                                       |          | 8.3%                                                                                                   |           |
| Percent of long-stay low-risk residents who lose control of their bowels or bladder.<br><b>Lower percentages are better.</b>               | 23.1%                                                                                                      |          | 39.0%                                                                                                  |           |
| Percent of long-stay residents who have/had a catheter inserted and left in their bladder.<br><b>Lower percentages are better.</b>         | 3.0%                                                                                                       |          | 4.9%                                                                                                   |           |
| Percent of long-stay residents who were physically restrained.<br><b>Lower percentages are better.</b>                                     | 1.0%                                                                                                       |          | 2.1%                                                                                                   |           |
| Percent of long-stay residents whose need for help with daily activities has increased.<br><b>Lower percentages are better.</b>            | 9.1%                                                                                                       |          | 4.9%                                                                                                   |           |
| Percent of long-stay residents who lose too much weight.<br><b>Lower percentages are better.</b>                                           | 6.1%                                                                                                       |          | 11.8%                                                                                                  |           |
| Percent of long-stay residents who have depressive symptoms.<br><b>Lower percentages are better.</b>                                       | 6.8%                                                                                                       |          | 1.1%                                                                                                   |           |
| Percent of long-stay residents assessed and given, appropriately, the seasonal influenza vaccine.<br><b>Higher percentages are better.</b> | 78.8%                                                                                                      |          | 95.8%                                                                                                  |           |
| Percent of long-stay residents assessed and given, appropriately, the pneumococcal vaccine.<br><b>Higher percentages are better.</b>       | 91.6%                                                                                                      |          | 86.3%                                                                                                  |           |
| Percent of long-stay residents who received an antipsychotic medication.<br><b>Lower percentages are better.</b>                           | 13.4%                                                                                                      |          | 28.2%                                                                                                  |           |
