# Supplementary material
Source: PubMed Central journal article supplement (PMC4874934)
Supplement: HESR-51-1212-s005.pdf [file HESR-51-1212-s005.pdf]

# Nursing Home Profile

General Information

Inspections and Complaints

Staffing

Quality Measures

Penalties

## Nursing Home D

### Overall Rating


  
Average

### Quality Measure


  
Much Above Average

Nursing Home D

State Average

National Average

### LONG-STAY RESIDENTS

#### Current data collection period

|                                                                                                                                            | Nursing Home D | State Average | National Average |
|--------------------------------------------------------------------------------------------------------------------------------------------|----------------|---------------|------------------|
| Percent of long-stay residents experiencing one or more falls with major injury.<br><i>Lower percentages are better.</i>                   | 0.0%           | 3.4%          | 3.4%             |
| Percent of long-stay residents with a urinary tract infection.<br><i>Lower percentages are better.</i>                                     | 3.4%           | 7.1%          | 7.6%             |
| Percent of long-stay residents who self-report moderate to severe pain.<br><i>Lower percentages are better.</i>                            | 2.4%           | 9.2%          | 11.6%            |
| Percent of long-stay high-risk residents with pressure ulcers.<br><i>Lower percentages are better.</i>                                     | 4.9%           | 7.7%          | 6.8%             |
| Percent of long-stay low-risk residents who lose control of their bowels or bladder.<br><i>Lower percentages are better.</i>               | 23.1%          | 34.4%         | 42.3%            |
| Percent of long-stay residents who have/had a catheter inserted and left in their bladder.<br><i>Lower percentages are better.</i>         | 3.0%           | 4.7%          | 4.2%             |
| Percent of long-stay residents who were physically restrained.<br><i>Lower percentages are better.</i>                                     | 1.0%           | 2.6%          | 2.2%             |
| Percent of long-stay residents whose need for help with daily activities has increased.<br><i>Lower percentages are better.</i>            | 9.1%           | 15.1%         | 16.4%            |
| Percent of long-stay residents who lose too much weight.<br><i>Lower percentages are better.</i>                                           | 6.1%           | 8.1%          | 7.3%             |
| Percent of long-stay residents who have depressive symptoms.<br><i>Lower percentages are better.</i>                                       | 6.8%           | 7.7%          | 7.4%             |
| Percent of long-stay residents assessed and given, appropriately, the seasonal influenza vaccine.<br><i>Higher percentages are better.</i> | 78.8%          | 92.6%         | 93.4%            |
| Percent of long-stay residents assessed and given, appropriately, the pneumococcal vaccine.<br><i>Higher percentages are better.</i>       | 91.6%          | 92.9%         | 94.3%            |
| Percent of long-stay residents who received an antipsychotic medication.<br><i>Lower percentages are better.</i>                           | 13.4%          | 26.0%         | 23.8%            |
